# Supplementary material
Source: Royal Society of Chemistry journal article supplement (doi:10.1039/d5cp04096e)
Supplement: d5cp04096e1.pdf [file d5cp04096e1.pdf]

## Supplementary Information

### Electro-wetting behavior of Imidazolium based Hydrophilic Ionic Liquid on Rough surface: A molecular dynamics study

*Devargya Chakraborty, Sandip Khan \**

Department of Chemical & Biochemical Engineering

Indian Institute of Technology Patna

Patna, India- 801106

#### 1. Ionic Liquid (IL) model

**Table S1.** Equilibrium density of Ionic liquids used in our work at 300 K and 1 bar pressure

| Ionic liquid              | Literature                     |                              | Present work<br>( $g/cm^3$ ) |
|---------------------------|--------------------------------|------------------------------|------------------------------|
|                           | Experimental-work ( $g/cm^3$ ) | Simulation-work ( $g/cm^3$ ) |                              |
| [EMIM] [BF <sub>4</sub> ] | 1.2798 [1]                     | ~ 1.28 [2]                   | ~1.28                        |

#### 2. Effect of Positive Electric field

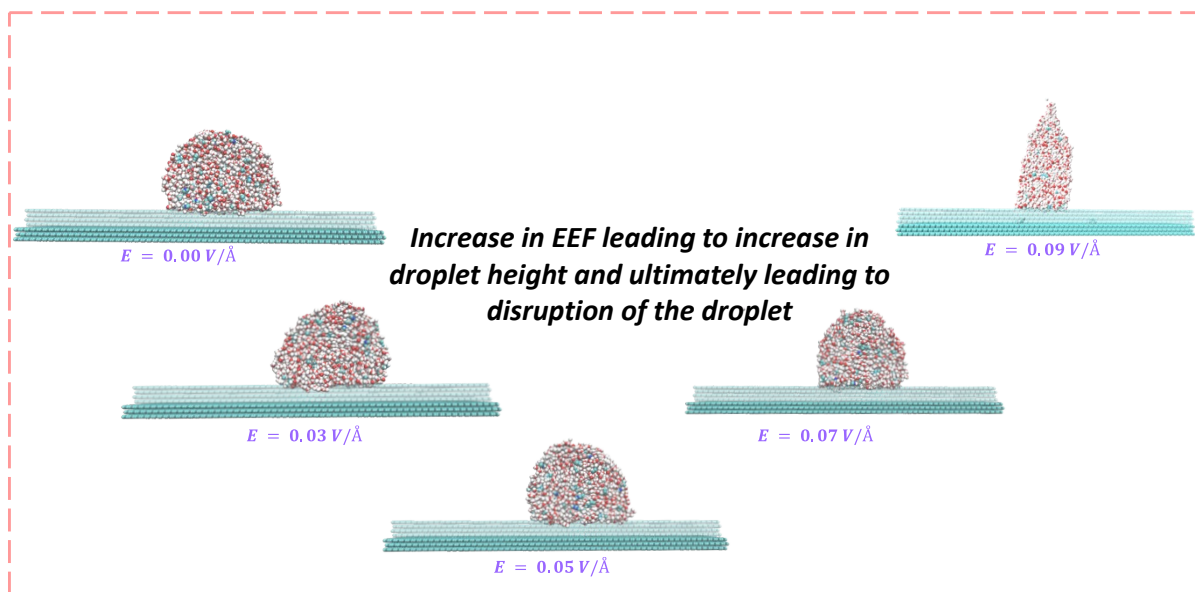

**Figure S1.** Change in droplet shape with the increase in positive EEF on 30 wt.% [EMIM] [BF<sub>4</sub>] system

### 3. Hydrogen Bond Criteria

**Table S2.** Geometric criteria for the Existence of HB in water-water and IL-water systems

- **Condition for the existence of water-water HB**

$$r_{O_w O_w} \leq 3.5 \text{ \AA}$$

$$r_{H_w O_w} \leq 2.4 \text{ \AA}$$

$$\varphi \leq 30^\circ$$

- **Condition for the existence of water-anion HB**

$$r_{FO} \leq 3.6 \text{ \AA}$$

$$r_{FH} \leq 2.45 \text{ \AA}$$

$$\varphi \leq 30^\circ$$

### References

- [1] W.-G. Xu, L. Li, X.-X. Ma, J. Wei, W.-B. Duan, W. Guan, J.-Z. Yang, Density, Surface Tension, and Refractive Index of Ionic Liquids Homologue of 1-Alkyl-3-methylimidazolium Tetrafluoroborate [C<sub>n</sub>mim][BF<sub>4</sub>] (n = 2,3,4,5,6), *Journal of Chemical & Engineering Data*, 57 (2012) 2177-2184.
- [2] O.Y. Fajardo, S. Di Lecce, F. Bresme, Molecular dynamics simulation of imidazolium C<sub>n</sub>MIM-BF<sub>4</sub> ionic liquids using a coarse grained force-field, *Physical Chemistry Chemical Physics*, 22 (2020) 1682-1692.
